# Supplementary material for: Amniotic membrane promotes focal adhesion remodeling to stimulate cell migration
Source: PubMed Central journal article supplement (PMC5681678; doi:10.1038/s41598-017-15509-z), 2017-11-10
Supplement: 41598_2017_15509_MOESM1_ESM.pdf [file 41598_2017_15509_MOESM1_ESM.pdf]

# **Amniotic membrane promotes focal adhesion remodeling to stimulate cell migration**

Ángel Bernabé-García<sup>1</sup>, Sergio Liarte<sup>1</sup>, José M. Moraleda<sup>2</sup>,  
Gregorio Castellanos<sup>3</sup> and Francisco J. Nicolás<sup>1,\*</sup>

<sup>1</sup>Laboratorio de Oncología Molecular y TGF- $\beta$ . IMIB-Arrixaca, El Palmar, Murcia, Spain.

<sup>2</sup>Unidad de Trasplante y Terapia Celular. Servicio Hematología. Hospital Universitario Virgen de la Arrixaca. Universidad de Murcia, Murcia, Spain.

<sup>3</sup>Servicio de Cirugía, Hospital Universitario Virgen de la Arrixaca, El Palmar, Murcia, Spain.

\*Corresponding author

E-mail: [franciscoj.nicolas2@carm.es](mailto:franciscoj.nicolas2@carm.es)

Running title: AM stimulates remodeling of focal adhesions.

## **Key words**

Amniotic membrane, Cell Migration, Wound healing, Focal Adhesion, Focal Complex, Keratinocyte.

Supplemental figure 1

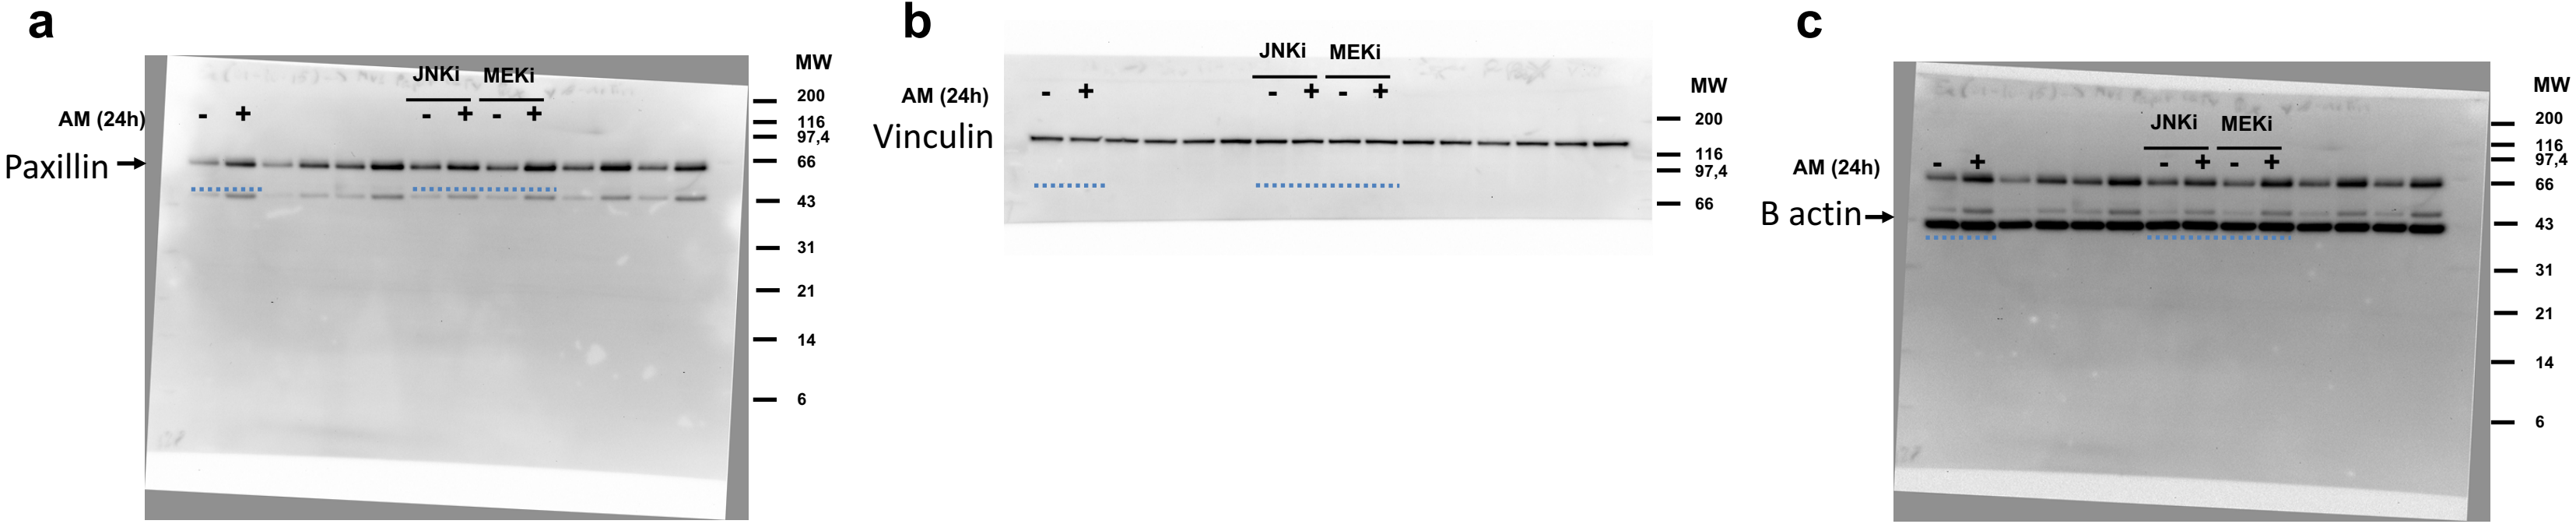

Supp. Fig 1. Full-length blots corresponding to crops showed in Fig 1b. (a) Paxillin. (b) Vinculin. (c) Beta-actin loading. Dashed blue line indicate the portion of the blot that was used in the figure.

# Supplemental figure 2

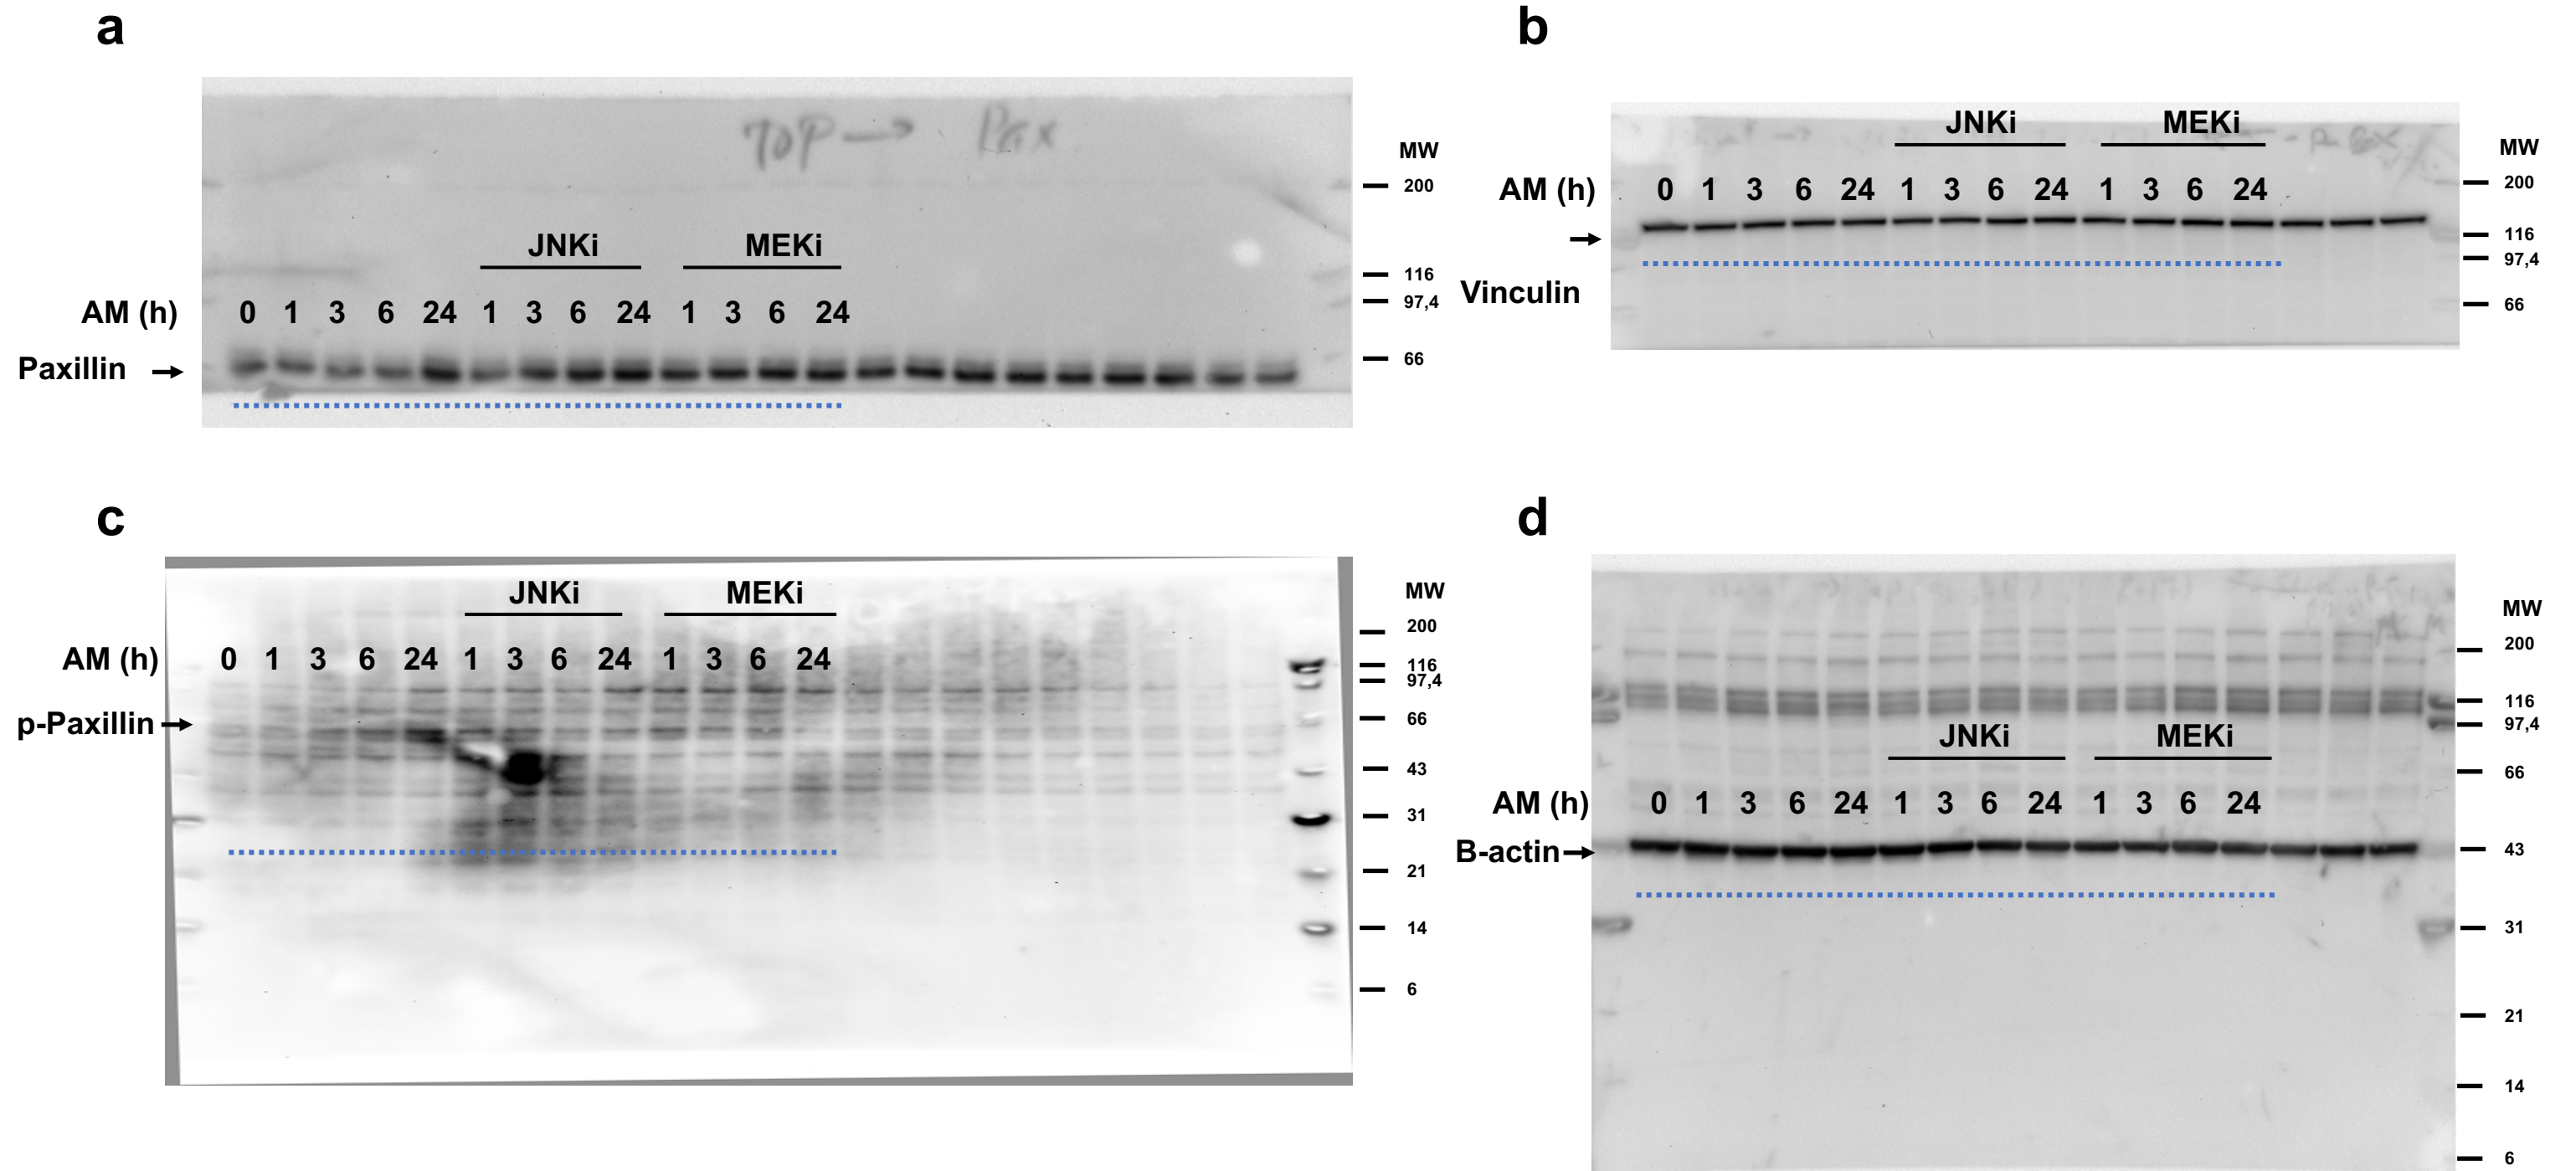

**Supp. Fig 2.** Full-length blots corresponding to crops showed in Fig 3b. (a) Paxillin. (b) Vinculin. (c) Ser 178 Phosphorilated-Paxillin. (d) Beta-actin loading. Dashed blue line indicate the portion of the blot that was used in the figure.

# Supplemental figure 3

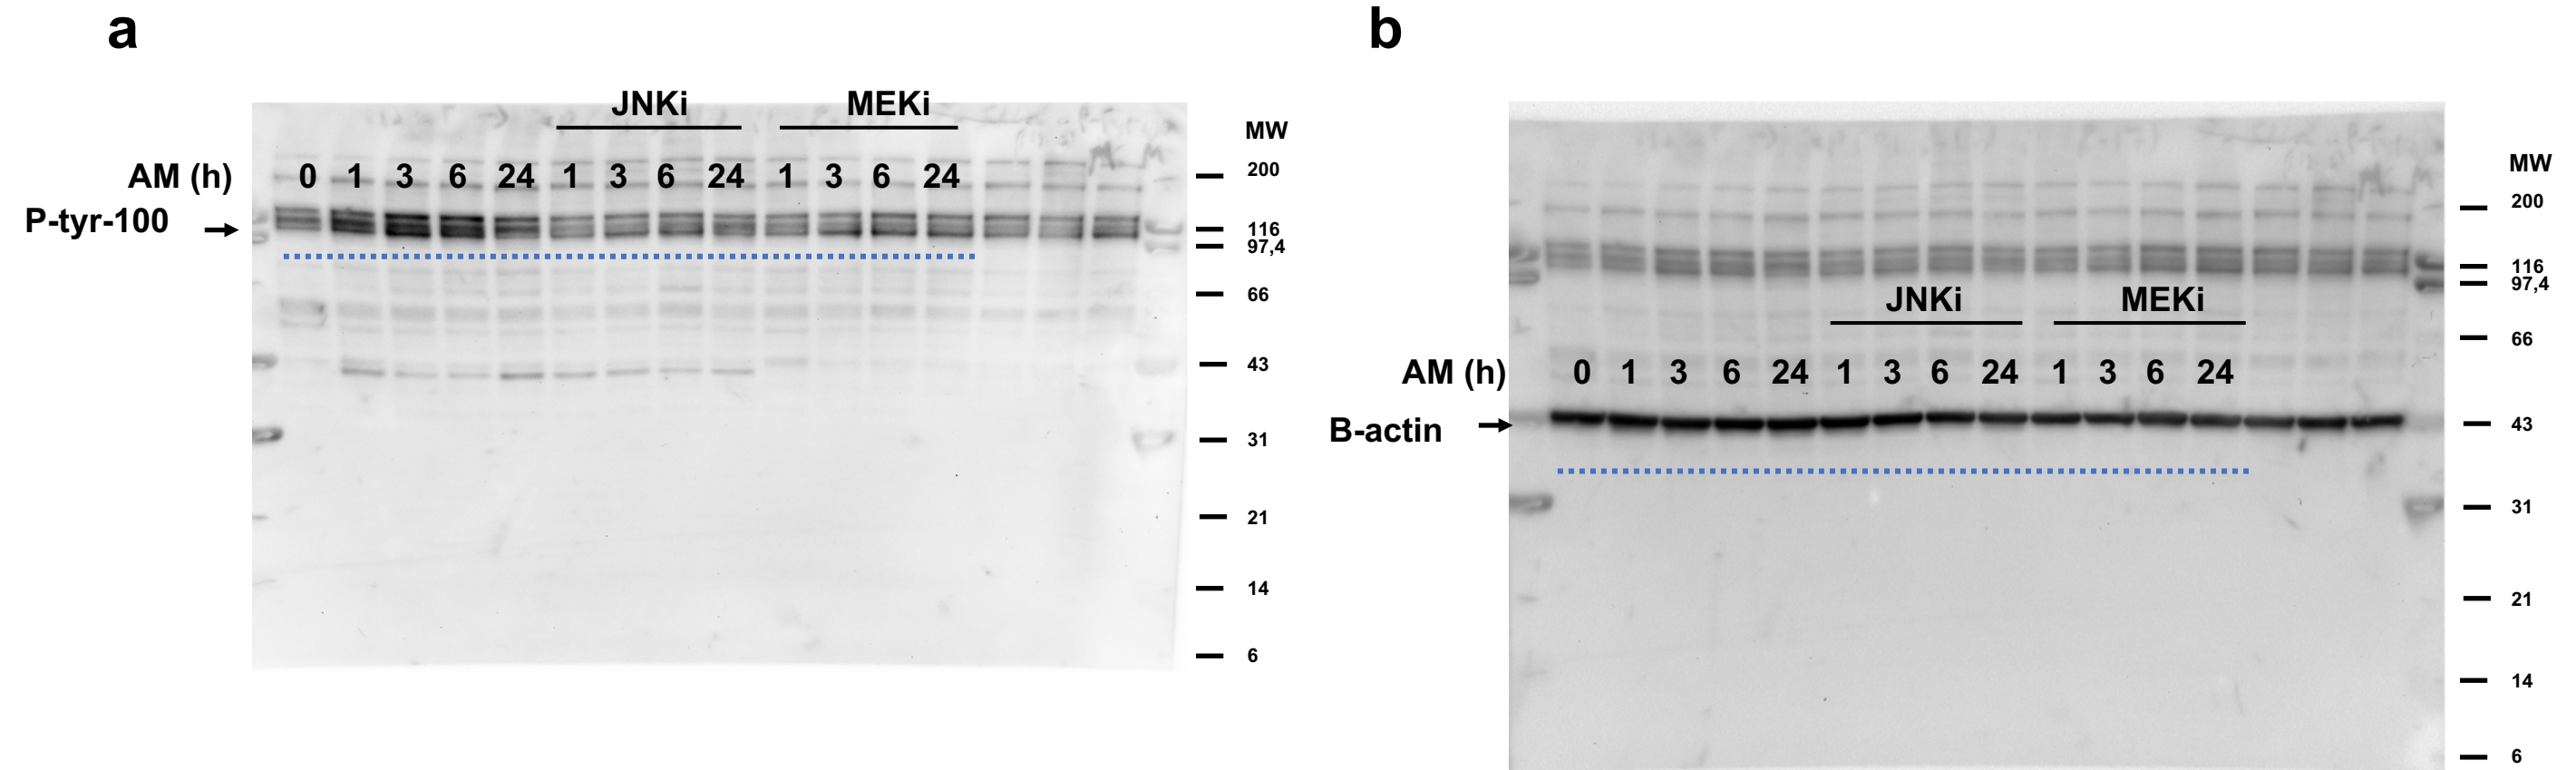

**Supp. Fig 3.** Full-length blots corresponding to crops showed in Fig 5b. (a) P-tyr-100. (b) Beta-actin loading. Dashed blue line indicate the portion of the blot that was used in the figure.
